# Supplementary material
Source: publisher site journal article supplement (https://www.dovepress.com/article/438096)

## Supplementary material for

# Diagnostic validity of chronic kidney disease in health claims data over time: results from a cohort of community-dwelling older adults in Germany

## List of contents

|                                                                                                                                                                                                                                                                                                                                                                |    |
|----------------------------------------------------------------------------------------------------------------------------------------------------------------------------------------------------------------------------------------------------------------------------------------------------------------------------------------------------------------|----|
| <i>Table S1 – STARD 2015 Checklist</i> .....                                                                                                                                                                                                                                                                                                                   | 2  |
| <i>Table S2 – Definition of chronic kidney disease (CKD) in BIS and claims data</i> .....                                                                                                                                                                                                                                                                      | 3  |
| <i>Figure S1 – Flowchart of the BIS study</i> .....                                                                                                                                                                                                                                                                                                            | 4  |
| <i>Figure S2 – Sensitivity stratified by age and sex</i> .....                                                                                                                                                                                                                                                                                                 | 5  |
| <i>Figure S3 – Specificity stratified by age and sex</i> .....                                                                                                                                                                                                                                                                                                 | 6  |
| <i>Figure S4 – Positive predictive values (PPV) stratified by age and sex</i> .....                                                                                                                                                                                                                                                                            | 7  |
| <i>Figure S5 – Negative predictive values (NPV) stratified by age and sex</i> .....                                                                                                                                                                                                                                                                            | 8  |
| <i>Figure S6 – Indicators of diagnostic validity (sensitivity, specificity, positive [PPV], and negative predictive values [NPV]) stratified by comorbidities for participants with either diabetes mellitus (without hypertension), arterial hypertension (without diabetes mellitus), both (diabetes mellitus and arterial hypertension), or none.</i> ..... | 9  |
| <i>Figure S7 – Indicators of diagnostic validity (sensitivity, specificity, positive [PPV], and negative predictive values [NPV]) for both the single and chronic CKD definition</i> .....                                                                                                                                                                     | 10 |
| <i>Figure S8 – Indicators of diagnostic validity (sensitivity, specificity, positive [PPV], and negative predictive values [NPV]) of different CKD definitions using weekly thresholds from one year preceding to one year following (preceding and following combined) a study visit as observation time for claims data diagnoses</i> .....                  | 11 |

Table S1 – STARD 2015 Checklist

| Section & Topic          | No         | Item                                                                                                                                                   | Reported on page # |
|--------------------------|------------|--------------------------------------------------------------------------------------------------------------------------------------------------------|--------------------|
| <b>TITLE OR ABSTRACT</b> |            |                                                                                                                                                        |                    |
|                          | <b>1</b>   | Identification as a study of diagnostic accuracy using at least one measure of accuracy (such as sensitivity, specificity, predictive values, or AUC)  | 1, 3               |
| <b>ABSTRACT</b>          |            |                                                                                                                                                        |                    |
|                          | <b>2</b>   | Structured summary of study design, methods, results, and conclusions (for specific guidance, see STARD for Abstracts)                                 | 3                  |
| <b>INTRODUCTION</b>      |            |                                                                                                                                                        |                    |
|                          | <b>3</b>   | Scientific and clinical background, including the intended use and clinical role of the index test                                                     | 4                  |
|                          | <b>4</b>   | Study objectives and hypotheses                                                                                                                        | 5                  |
| <b>METHODS</b>           |            |                                                                                                                                                        |                    |
| <i>Study design</i>      | <b>5</b>   | Whether data collection was planned before the index test and reference standard were performed (prospective study) or after (retrospective study)     | 5                  |
| <i>Participants</i>      | <b>6</b>   | Eligibility criteria                                                                                                                                   | 5                  |
|                          | <b>7</b>   | On what basis potentially eligible participants were identified (such as symptoms, results from previous tests, inclusion in registry)                 | 5                  |
|                          | <b>8</b>   | Where and when potentially eligible participants were identified (setting, location and dates)                                                         | 5                  |
|                          | <b>9</b>   | Whether participants formed a consecutive, random or convenience series                                                                                | 5                  |
| <i>Test methods</i>      | <b>10a</b> | Index test, in sufficient detail to allow replication                                                                                                  | 6                  |
|                          | <b>10b</b> | Reference standard, in sufficient detail to allow replication                                                                                          | 6                  |
|                          | <b>11</b>  | Rationale for choosing the reference standard (if alternatives exist)                                                                                  | 6                  |
|                          | <b>12a</b> | Definition of and rationale for test positivity cut-offs or result categories of the index test, distinguishing pre-specified from exploratory         | 6-7                |
|                          | <b>12b</b> | Definition of and rationale for test positivity cut-offs or result categories of the reference standard, distinguishing pre-specified from exploratory | 6-7                |
|                          | <b>13a</b> | Whether clinical information and reference standard results were available to the performers/readers of the index test                                 | n/a                |
|                          | <b>13b</b> | Whether clinical information and index test results were available to the assessors of the reference standard                                          | n/a                |
| <i>Analysis</i>          | <b>14</b>  | Methods for estimating or comparing measures of diagnostic accuracy                                                                                    | 6-7                |
|                          | <b>15</b>  | How indeterminate index test or reference standard results were handled                                                                                | 5                  |
|                          | <b>16</b>  | How missing data on the index test and reference standard were handled                                                                                 | 5                  |
|                          | <b>17</b>  | Any analyses of variability in diagnostic accuracy, distinguishing pre-specified from exploratory                                                      | 6-8                |
|                          | <b>18</b>  | Intended sample size and how it was determined                                                                                                         | 5                  |
| <b>RESULTS</b>           |            |                                                                                                                                                        |                    |
| <i>Participants</i>      | <b>19</b>  | Flow of participants, using a diagram                                                                                                                  | 8, Figure S1       |
|                          | <b>20</b>  | Baseline demographic and clinical characteristics of participants                                                                                      | 8, Table 1         |
|                          | <b>21a</b> | Distribution of severity of disease in those with the target condition                                                                                 | 8, Table 1         |
|                          | <b>21b</b> | Distribution of alternative diagnoses in those without the target condition                                                                            | Figure 2           |
|                          | <b>22</b>  | Time interval and any clinical interventions between index test and reference standard                                                                 | n/a                |
| <i>Test results</i>      | <b>23</b>  | Cross tabulation of the index test results (or their distribution) by the results of the reference standard                                            | 8-10, Table 2      |
|                          | <b>24</b>  | Estimates of diagnostic accuracy and their precision (such as 95% confidence intervals)                                                                | 8-10, Table 2      |
|                          | <b>25</b>  | Any adverse events from performing the index test or the reference standard                                                                            | n/a                |
| <b>DISCUSSION</b>        |            |                                                                                                                                                        |                    |
|                          | <b>26</b>  | Study limitations, including sources of potential bias, statistical uncertainty, and generalisability                                                  | 13                 |
|                          | <b>27</b>  | Implications for practice, including the intended use and clinical role of the index test                                                              | 10-13              |
| <b>OTHER INFORMATION</b> |            |                                                                                                                                                        |                    |
|                          | <b>28</b>  | Registration number and name of registry                                                                                                               | n/a                |
|                          | <b>29</b>  | Where the full study protocol can be accessed                                                                                                          | n/a                |
|                          | <b>30</b>  | Sources of funding and other support; role of funders                                                                                                  | 15                 |

Table S2 – Definition of chronic kidney disease (CKD) in BIS and claims data

| BIS data                    |                                                                                                                             | Health claims data                                                                                                                                                                                                                                                                     |
|-----------------------------|-----------------------------------------------------------------------------------------------------------------------------|----------------------------------------------------------------------------------------------------------------------------------------------------------------------------------------------------------------------------------------------------------------------------------------|
| Reference group             | eGFR based definition                                                                                                       | Claims-based definition                                                                                                                                                                                                                                                                |
| CKD G3-5                    | eGFR <60 ml/min/1.73 m <sup>2</sup>                                                                                         | At least one of the following ICD-10-GM diagnoses (# displaying different operationalisations) within 6 months prior and 6 months post index date:<br>#1 N18.3, N18.4, N18.5<br>#2 N18.3, N18.4, N18.5, N18.8x, N18.9, N19<br>#3 N18.1, N18.2, N18.3, N18.4, N18.5, N18.8x, N18.9, N19 |
| CKD G3                      | eGFR 30–<60 ml/min/1.73 m <sup>2</sup>                                                                                      | At least one ICD-10-GM diagnosis N18.3 within 6 months prior to 6 months post index date                                                                                                                                                                                               |
| CKD G4-5                    | eGFR <30 ml/min/1.73 m <sup>2</sup>                                                                                         | At least one ICD-10-GM diagnosis N18.4 or N18.5 within 6 months prior to 6 months post index date                                                                                                                                                                                      |
| CKD G3-5 <sub>chronic</sub> | eGFR <60 ml/min/1.73 m <sup>2</sup> in two consecutive study visits; the latter study visit is defined as the index date    | At least one of the following ICD-10-GM diagnoses (# displaying different operationalisations) within 6 months prior and 6 months post index date:<br>#1 N18.3, N18.4, N18.5<br>#2 N18.3, N18.4, N18.5, N18.8x, N18.9, N19<br>#3 N18.1, N18.2, N18.3, N18.4, N18.5, N18.8x, N18.9, N19 |
| CKD G3 <sub>chronic</sub>   | eGFR 30–<60 ml/min/1.73 m <sup>2</sup> in two consecutive study visits; the latter study visit is defined as the index date | At least one ICD-10-GM diagnosis N18.3 within 6 months prior and 6 months post index date                                                                                                                                                                                              |
| CKD G4-5 <sub>chronic</sub> | eGFR <30 ml/min/1.73 m <sup>2</sup> in two consecutive study visits; the latter study visit is defined as the index date    | At least one ICD-10-GM diagnosis N18.4 or N18.5 within 6 months prior and 6 months post index date                                                                                                                                                                                     |

*Abbreviations:* BIS: Berlin Initiative Study; CKD: Chronic kidney disease; G3-5, G3, G4-5: Certain CKD stages as recommended in the Kidney Disease: Improving Global Outcomes (KDIGO) guidelines; eGFR: Estimated glomerular filtration rate; ICD-10-GM: International Statistical Classification of Diseases and Related Health Problems, 10<sup>th</sup> Revision, German modification.

Figure S1 – Flowchart of the BIS study. Shown are the number of participants seen at a respective study visit (with no-shows) from baseline to follow-up 4, periods in which data assessment took place, the number of excluded persons due to missing serum creatinine values, as well as the dropout cases due to death and loss to follow-up. Dropouts were considered as dead if a participant died before or within 3 months of the next intended follow-up (2 \* x years after the baseline visit); all alive participants or later deaths were considered as lost to follow up with regard to the next pending follow-up. Participants who missed only single follow-ups in between (n=69) are displayed as “no-show”.

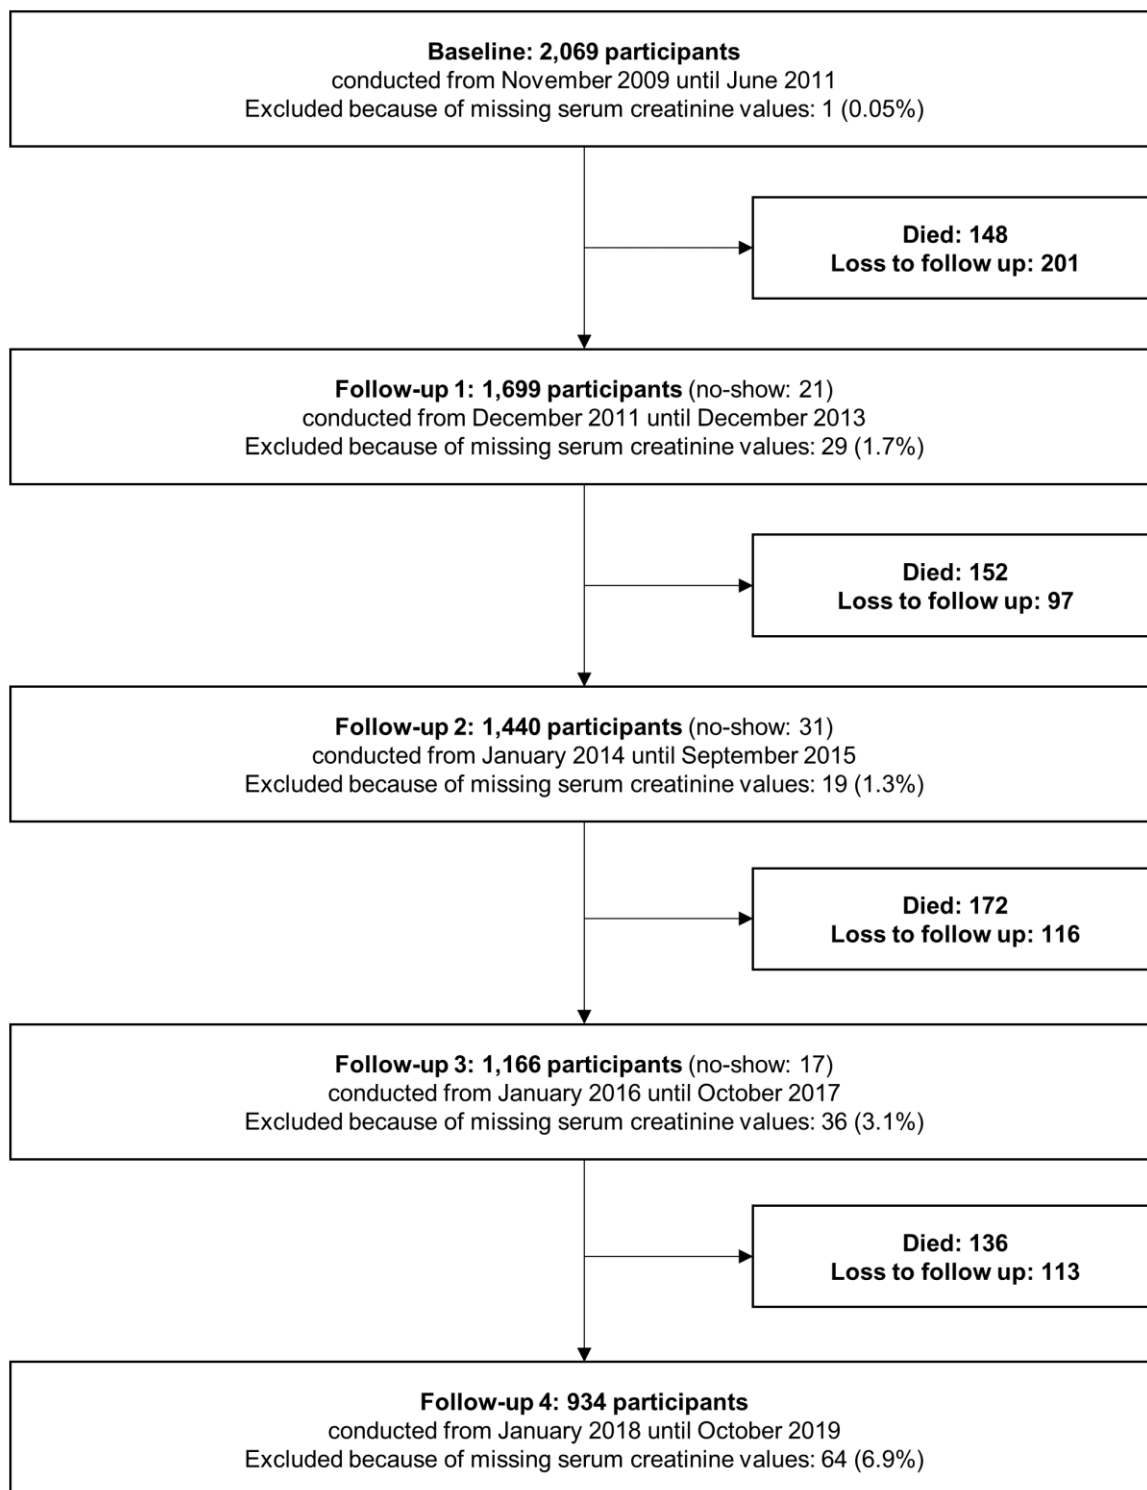

Figure S2 – Sensitivity stratified by age and sex. Shades represent 95% confidence intervals and are interpolated between study visits for graphical display.

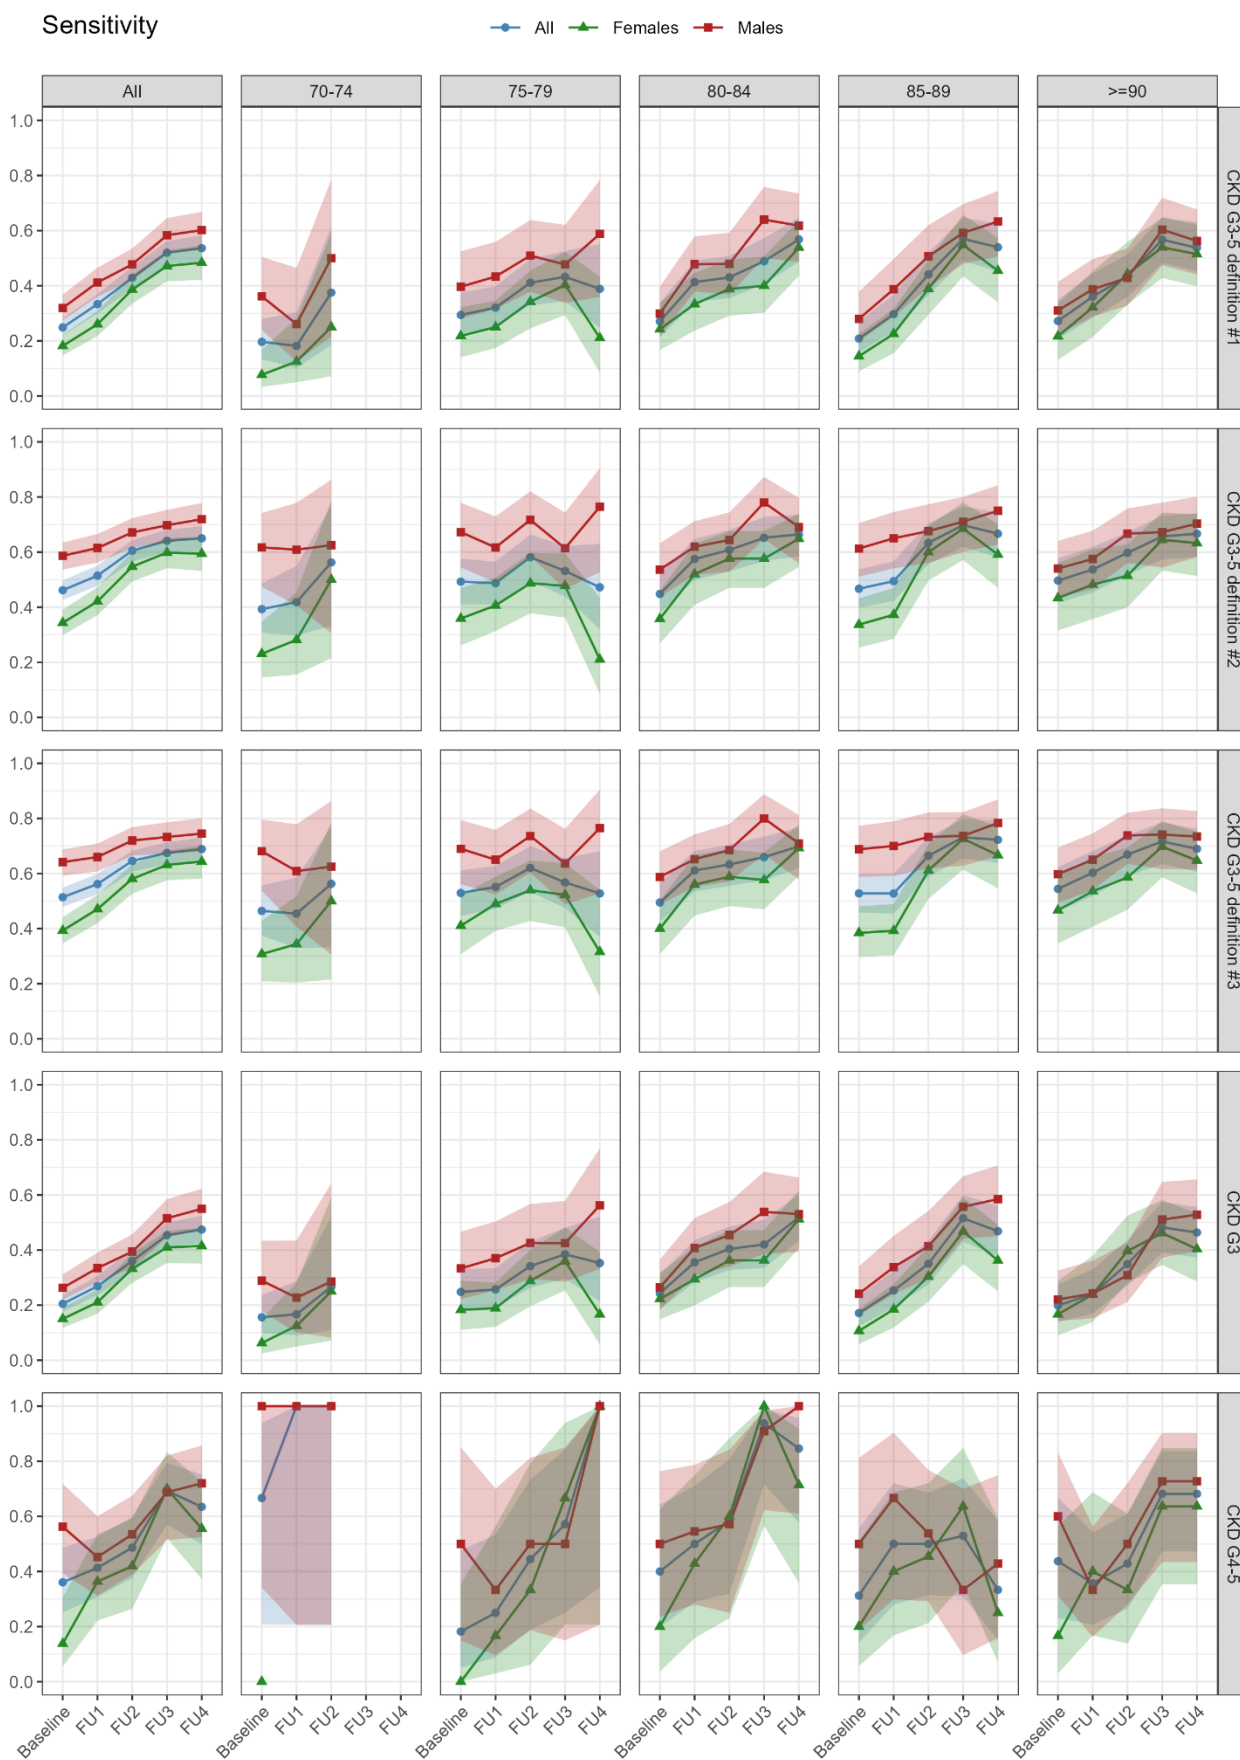

Figure S3– Specificity stratified by age and sex. Shades represent 95% confidence intervals and are interpolated between study visits for graphical display.

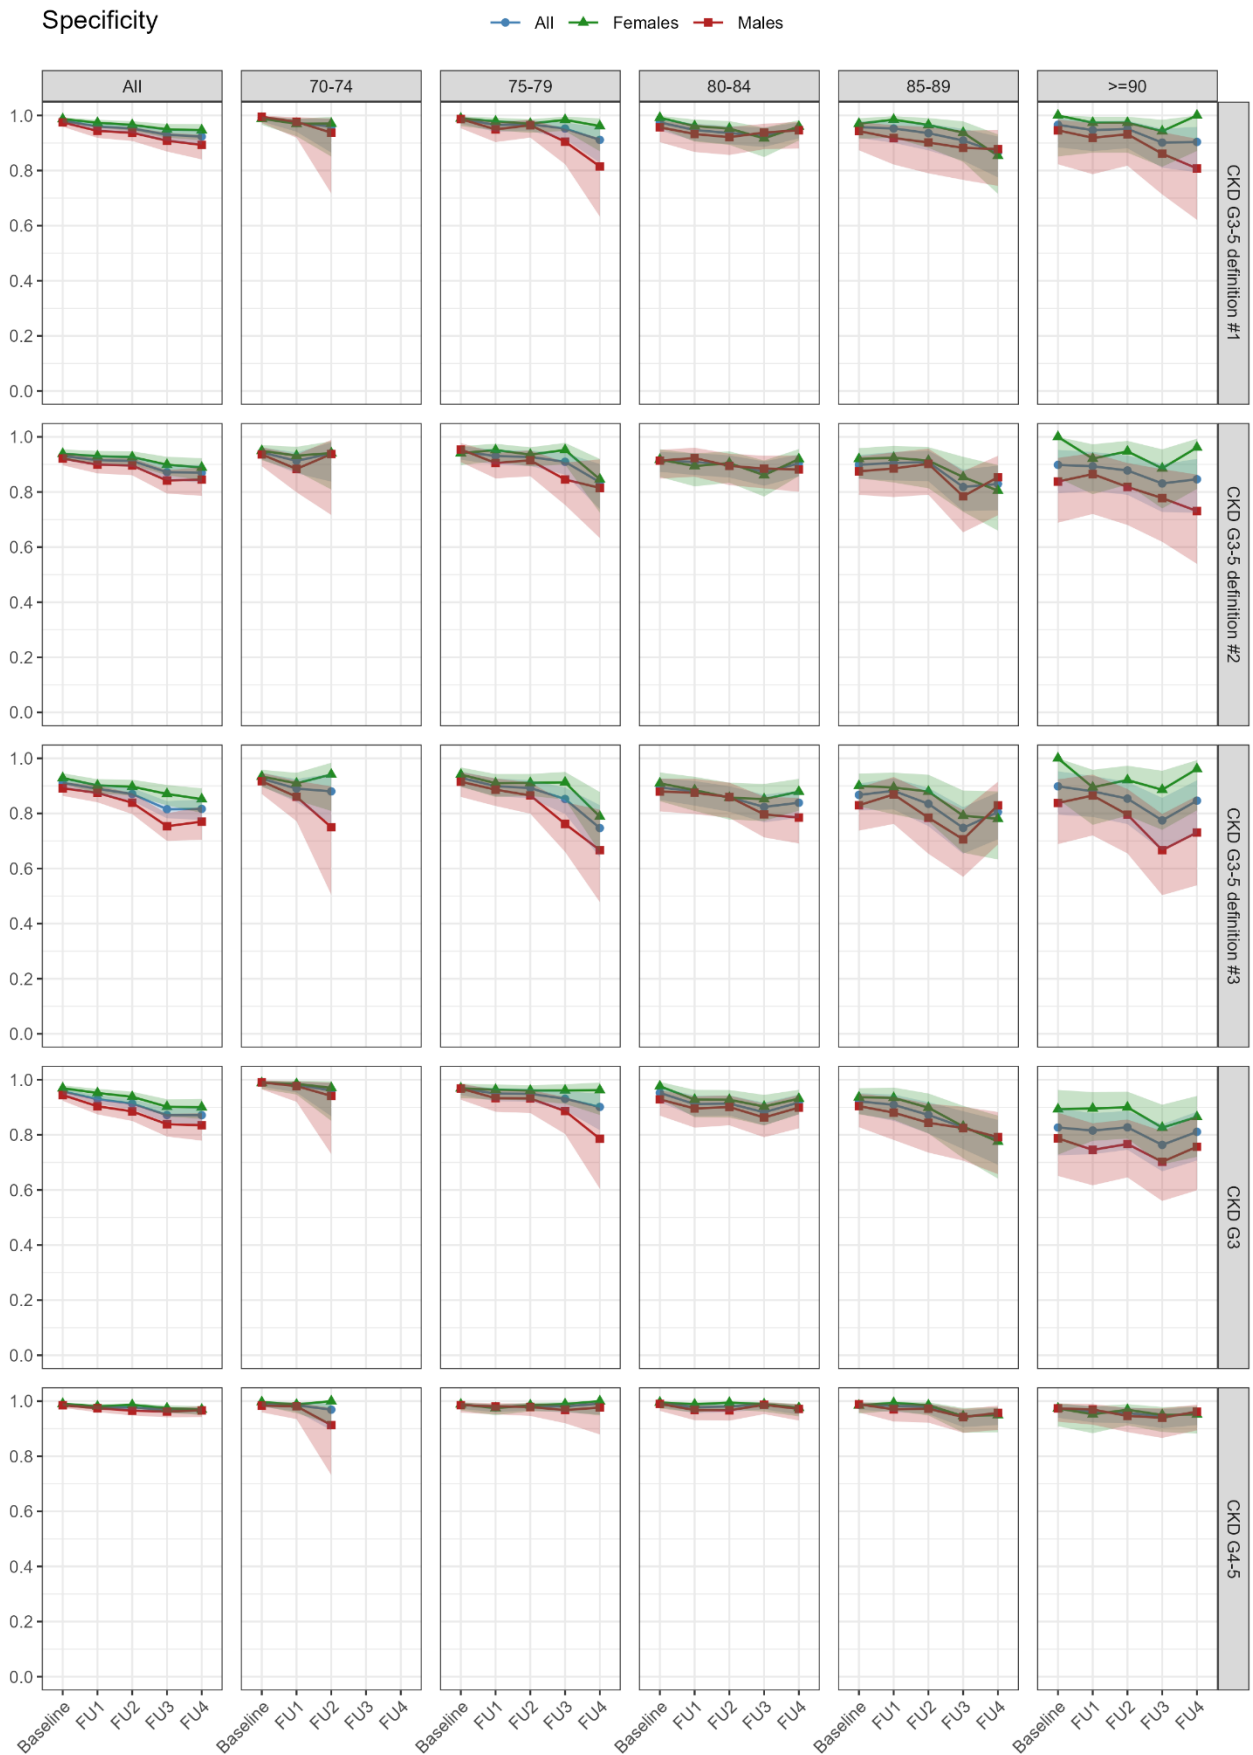

Figure S4 – Positive predictive values (PPV) stratified by age and sex. Shades represent 95% confidence intervals and are interpolated between study visits for graphical display.

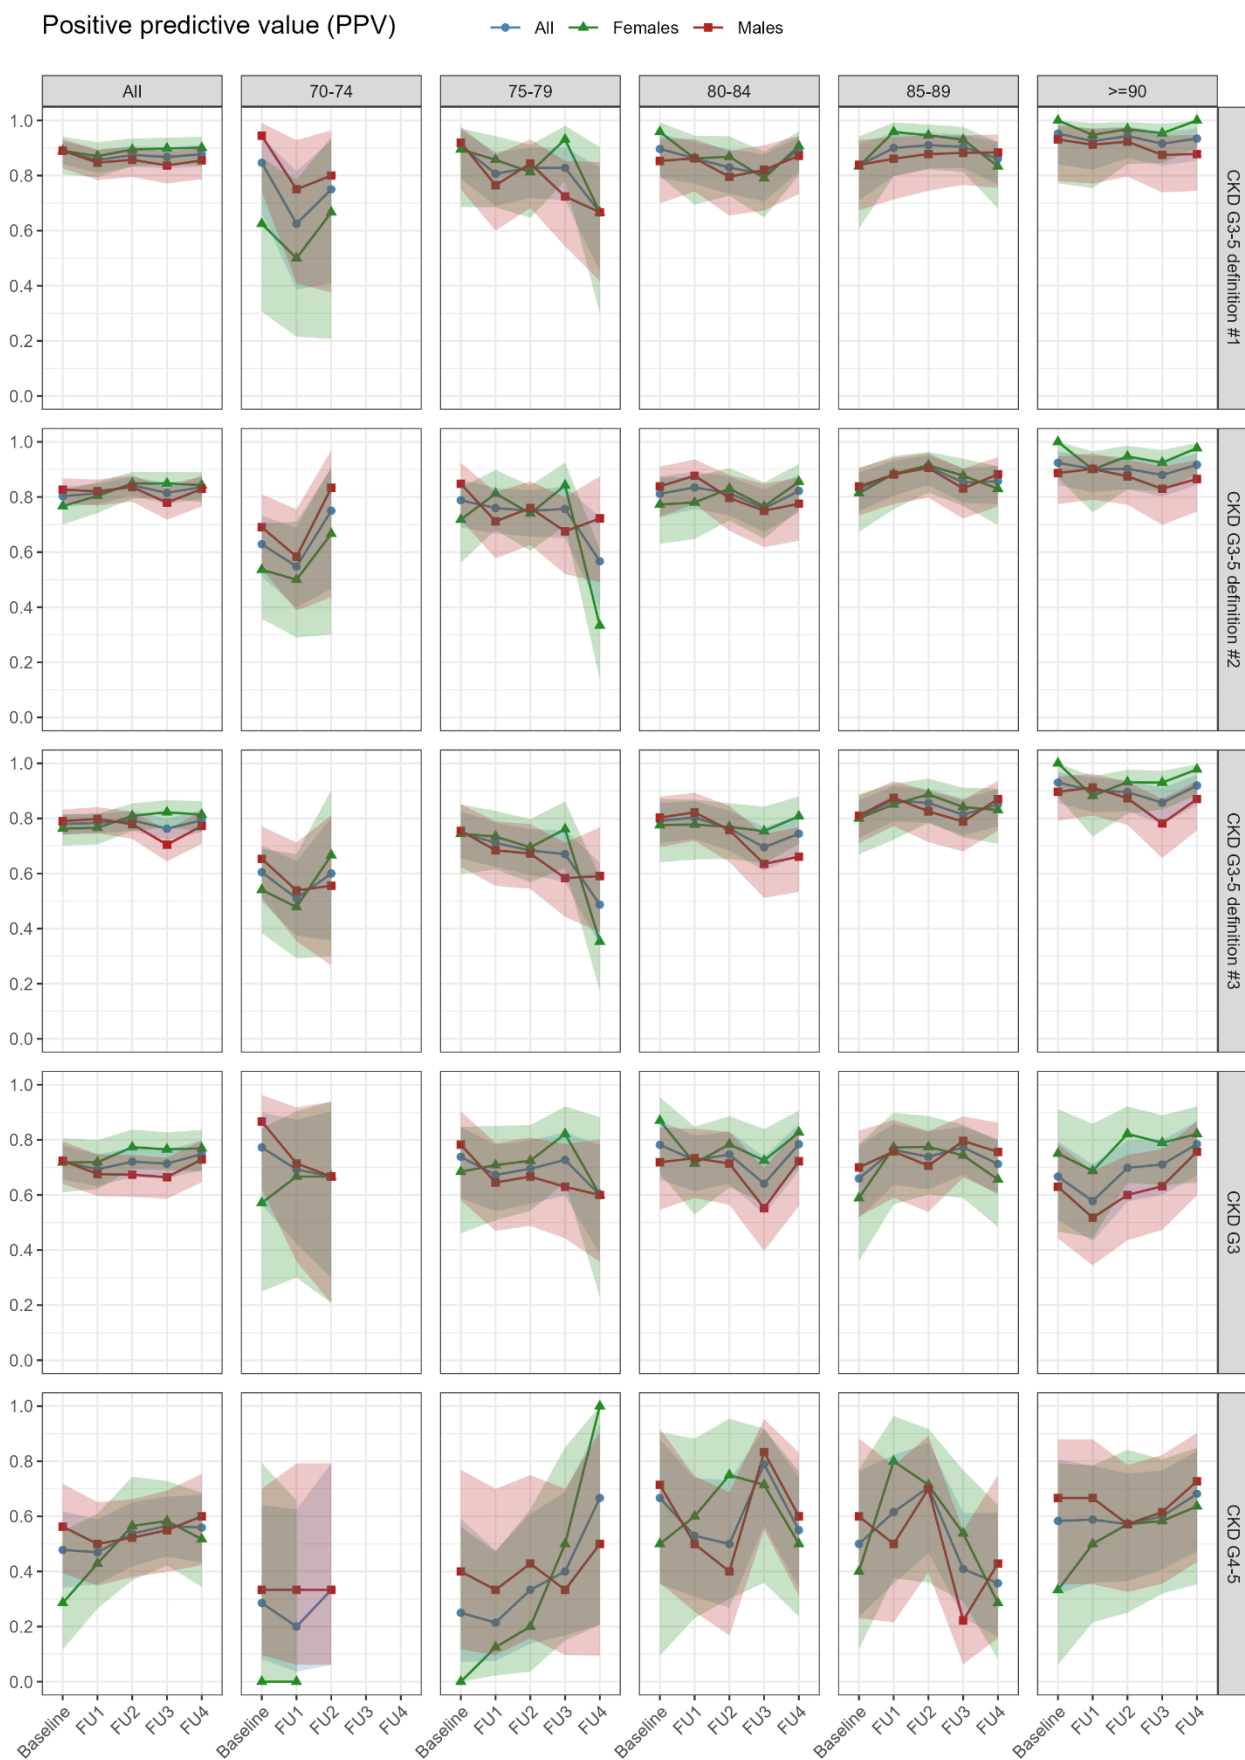

Figure S5 – Negative predictive values (NPV) stratified by age and sex. Shades represent 95% confidence intervals and are interpolated between study visits for graphical display.

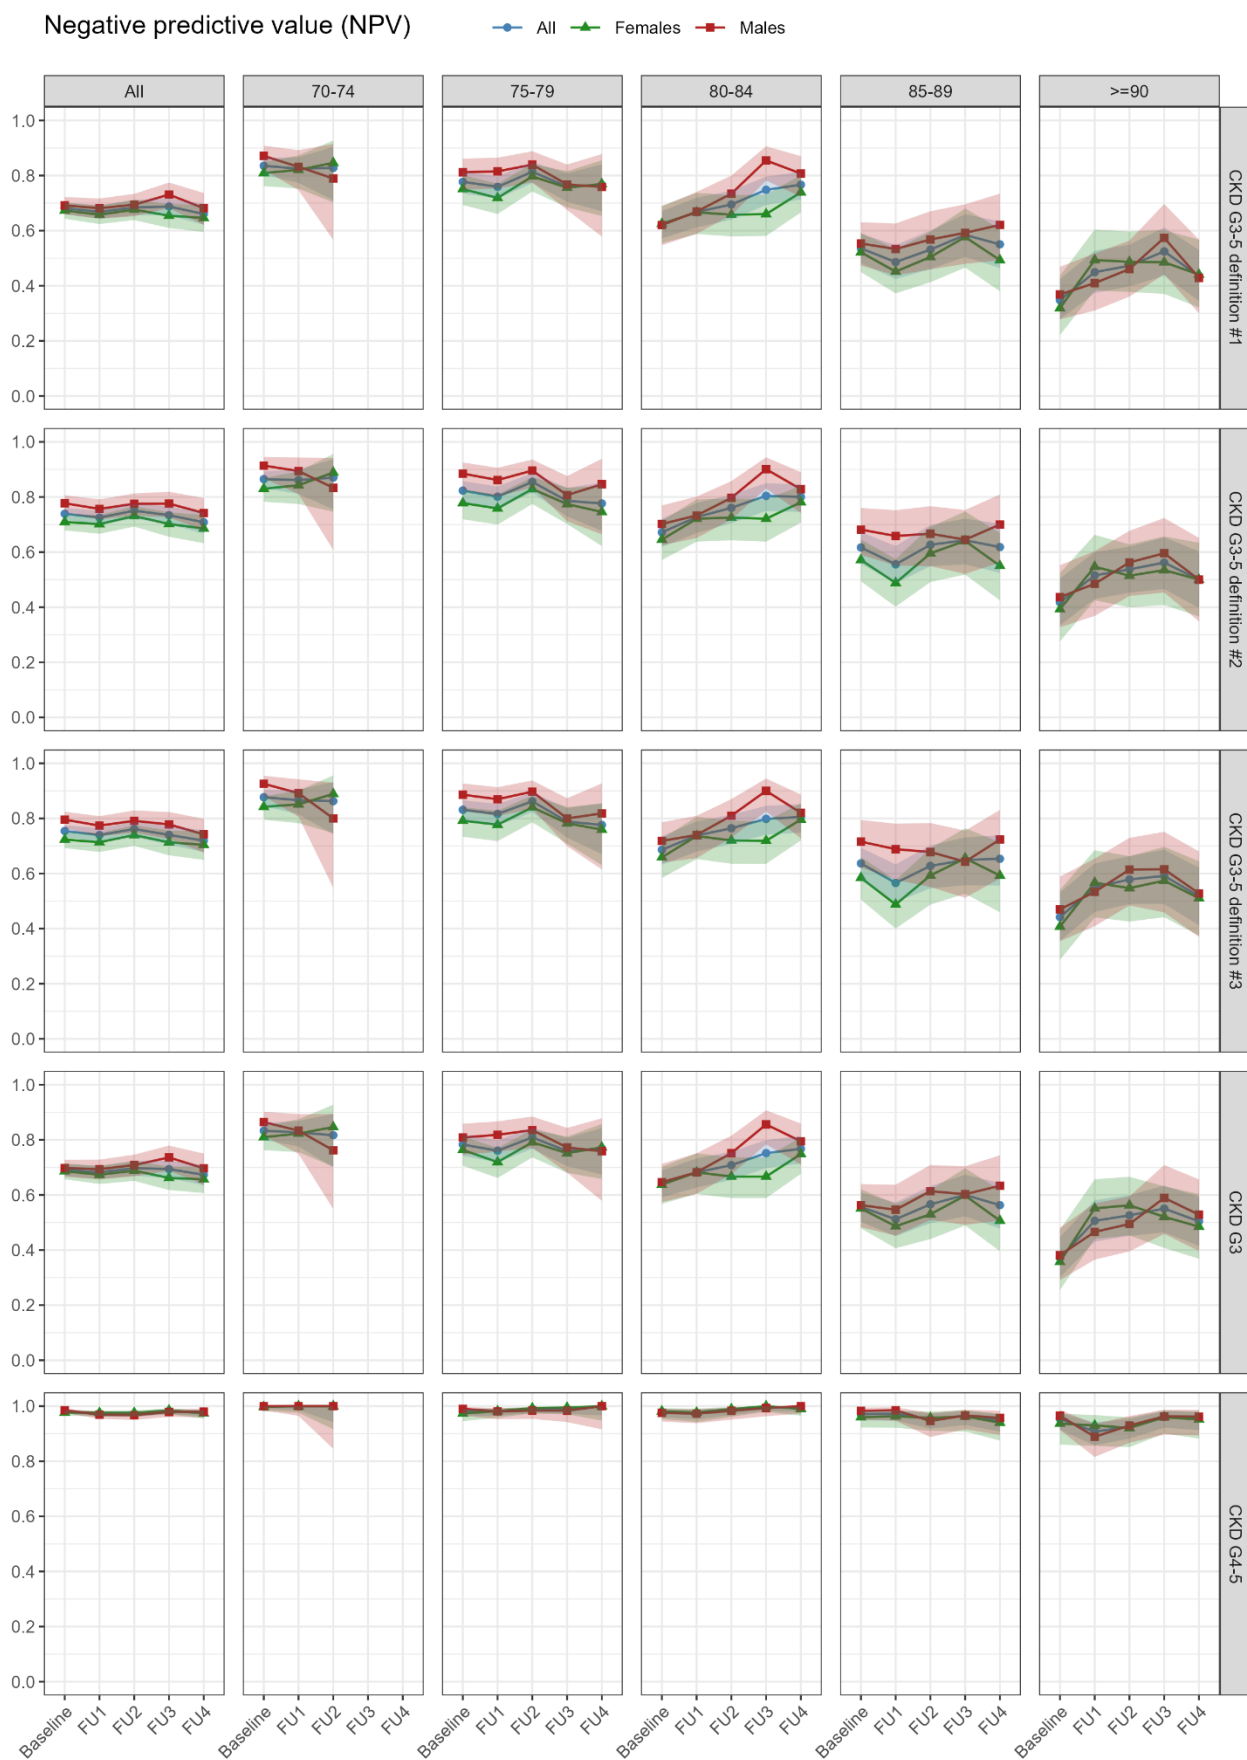



Figure S6 – Indicators of diagnostic validity (sensitivity, specificity, positive [PPV], and negative predictive values [NPV]) stratified by comorbidities for participants with either diabetes mellitus (without hypertension), arterial hypertension (without diabetes mellitus), both (diabetes mellitus and arterial hypertension), or none. Shades represent 95% confidence intervals and are interpolated between study visits for graphical display.

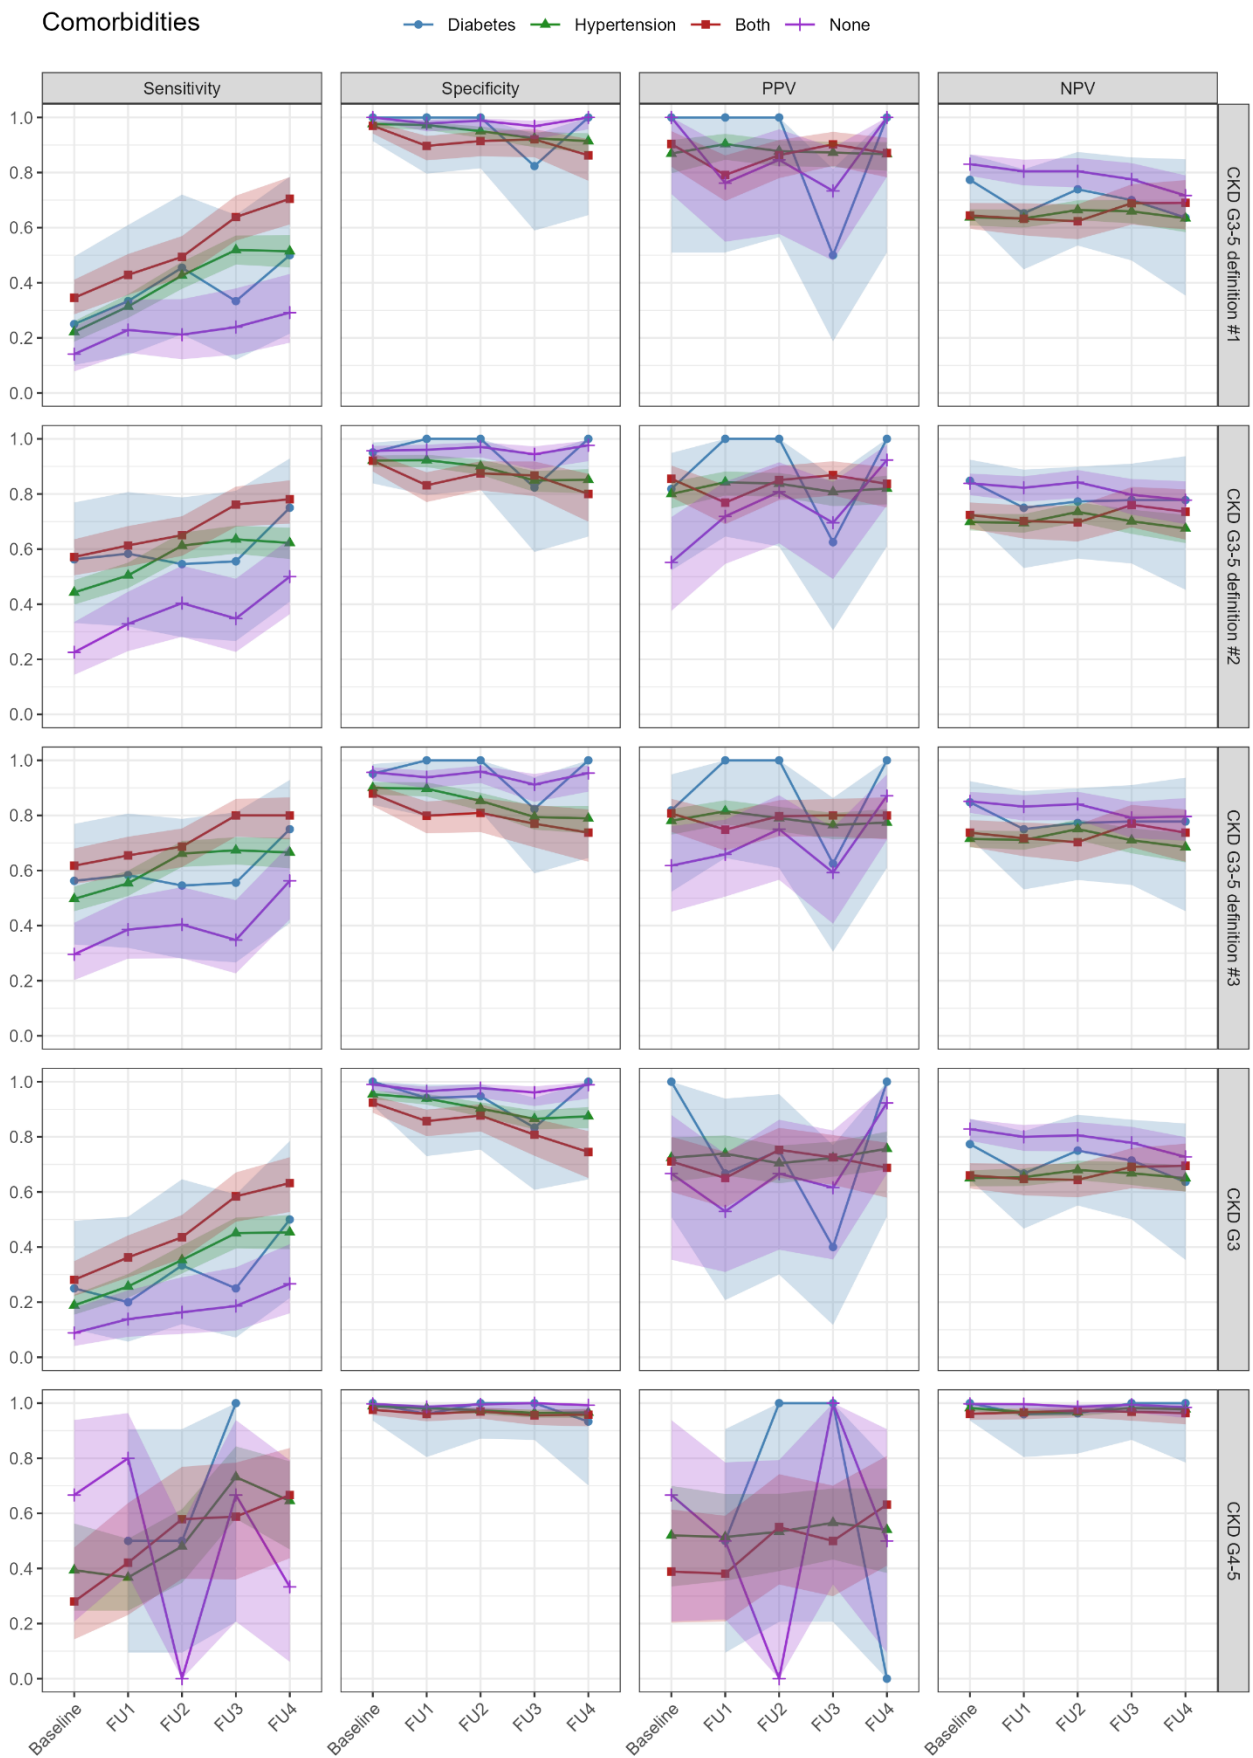

Figure S7 – Indicators of diagnostic validity (sensitivity, specificity, positive [PPV], and negative predictive values [NPV]) for both the single and chronic CKD definition (see Table S1 for the definitions). Shades represent 95% confidence intervals and are interpolated between study visits for graphical display.

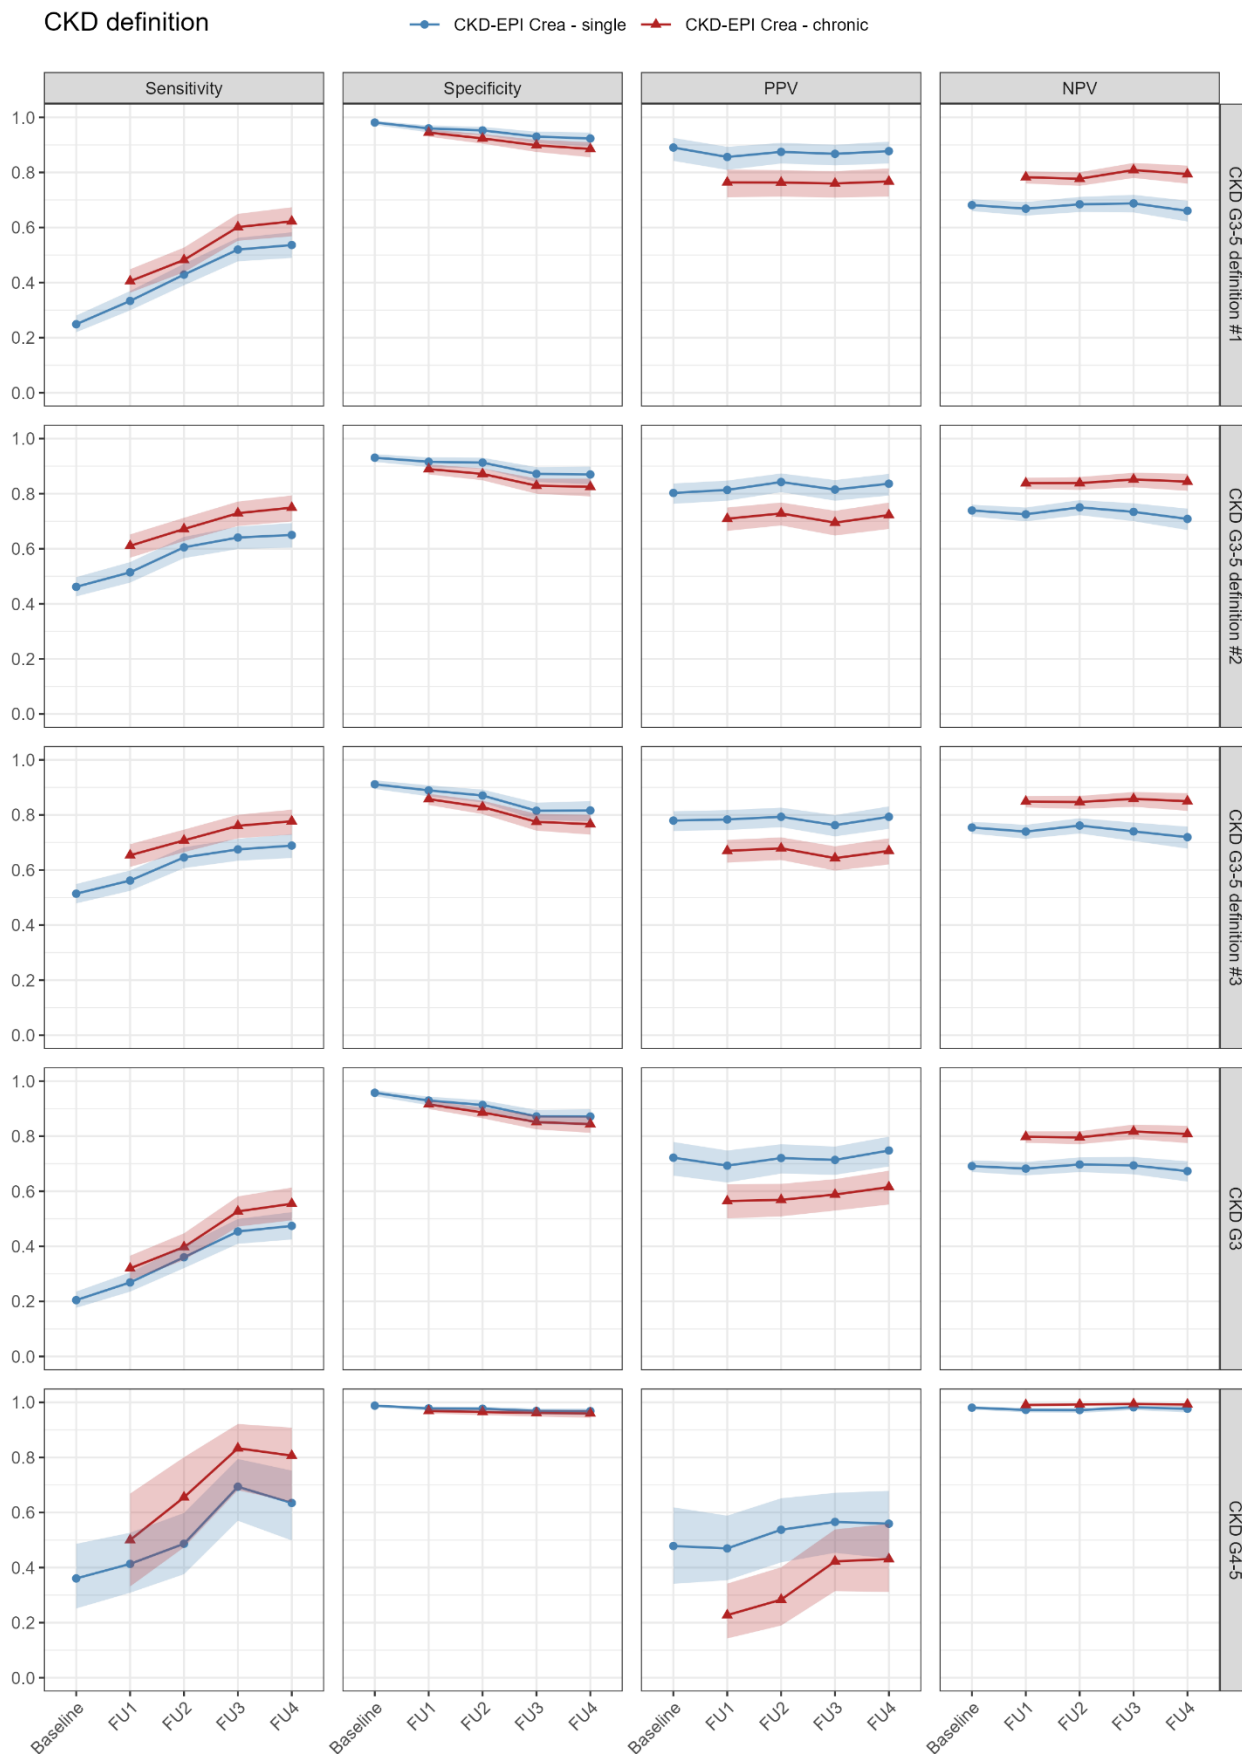

Figure S8 – Indicators of diagnostic validity (sensitivity, specificity, positive [PPV], and negative predictive values [NPV]) of different CKD definitions using weekly thresholds from one year preceding to one year following (preceding and following combined) a study visit as observation time for claims data diagnoses. Dashed lines represent the observation time window for the main analysis of +/- 6 months. Shades represent 95% confidence intervals and are interpolated for graphical display.

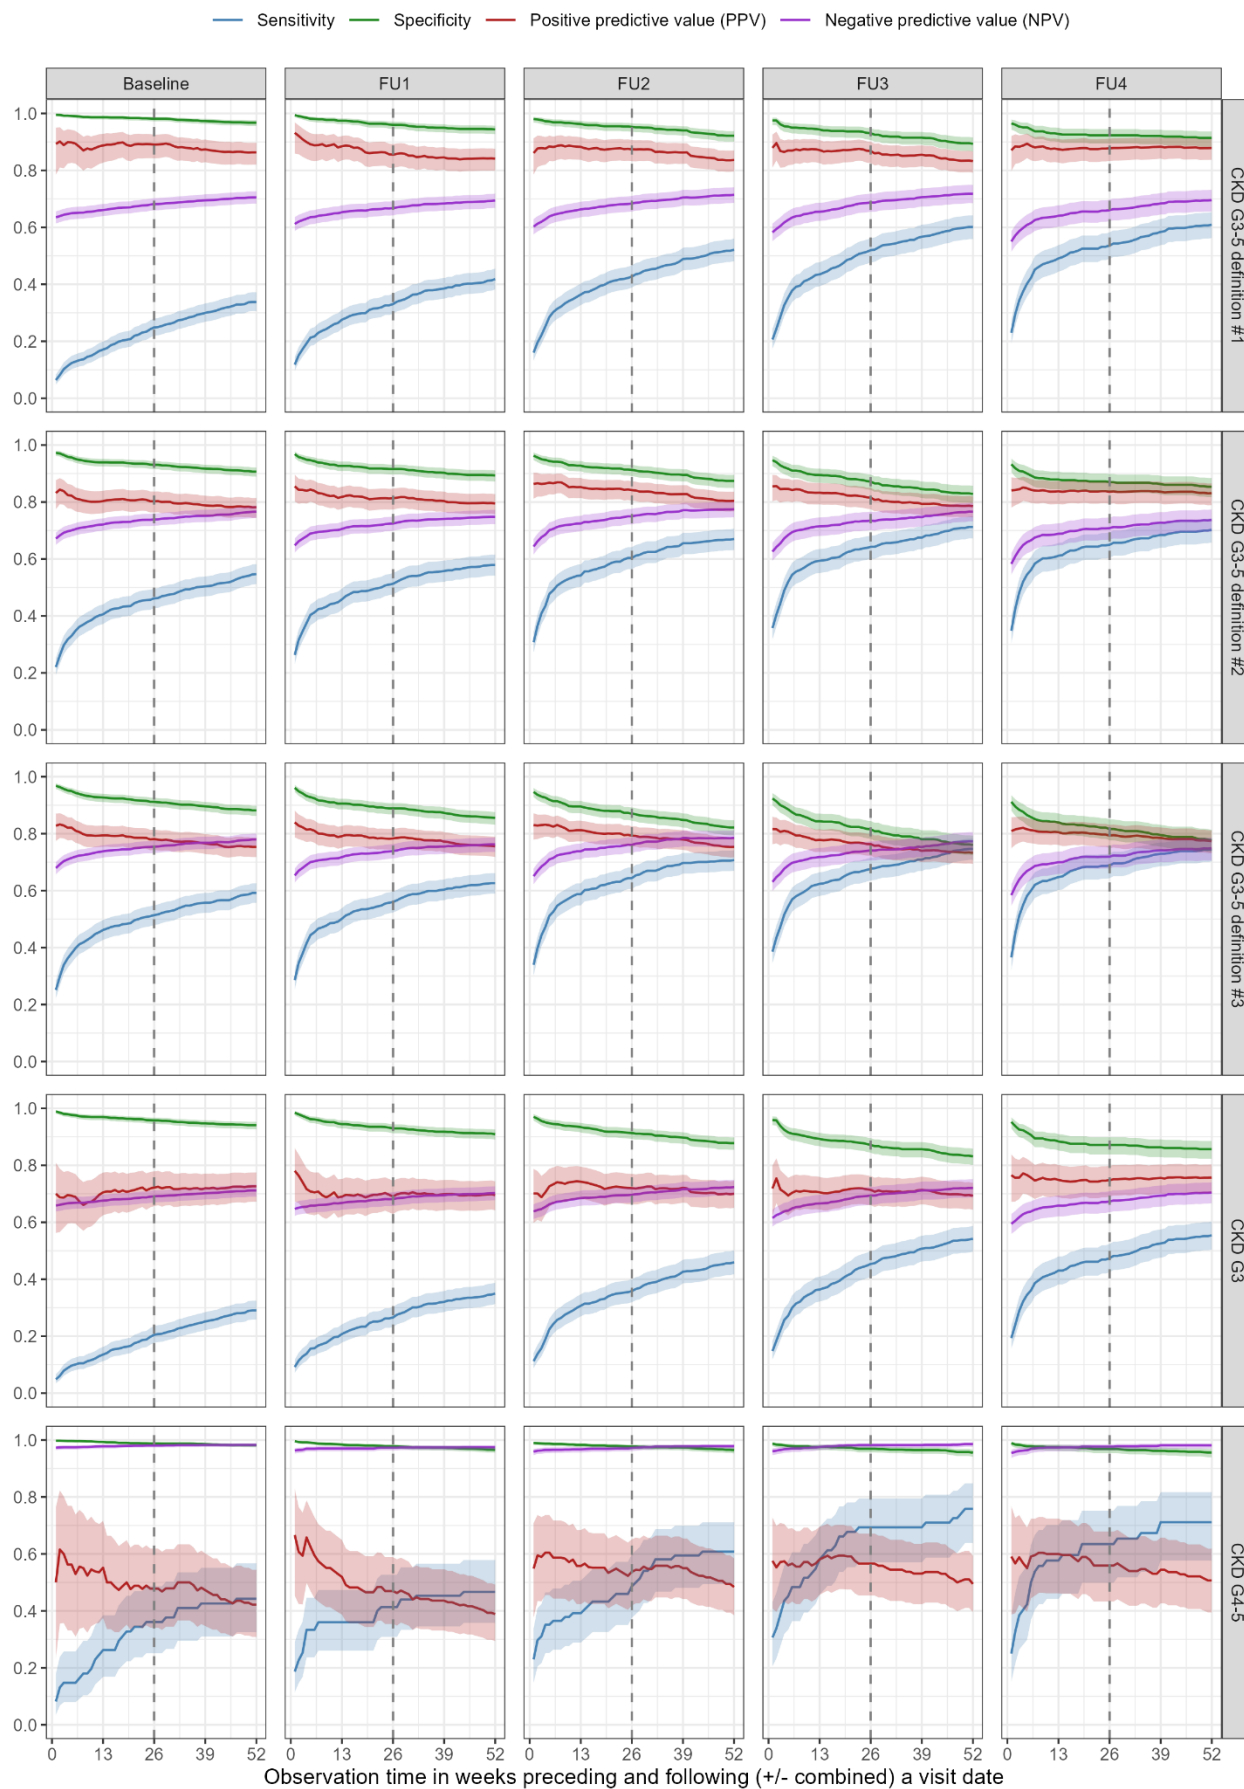

Supplement: Supplementary file 1 [file get_supplementary_file.php]
